# Supplementary material for: Integrated neoantigen and immune cell profiling of POLε-mutant colorectal tumors reveals distinct immune sub-types
Source: Research Square preprint supplement (doi:10.21203/rs.3.rs-7245242/v1), 2025-09-02
Supplement: Supplementary file 1 [file 00c2fd471edce8a757b4dbb8.xlsx]

## Sheet: Supplementary Table3
Samples/patients classified based on M1 Macrophages, CD8 T cells, and Neoantigen expression levels in stage II and III with the mutation information
Patient ID	WESid	POLε Status	Stage	Macrophages M1	Macrophages_M1_Classification	T cells CD8	T_cells_CD8_Classification	NeoExpressionLevel	Protein_change	Mutation_Location	Venn_Group
GUC3Y9K1I9	FT_SA167458	mut	II	0.158724	High	0.427259	High	High	E161G	161	CD8_High_M1_High
19S0JZ3JLJ	SL393339	mut	II	0.170004	High	0.151945	High	High	S459F	459	CD8_High_M1_High
0HPR0MD9YC	FT_SA172306	mut	II	0.23091	High	0.202756	High	High	R722M	722	CD8_High_M1_High
19S0JZ3JLJ	SL393339	mut	II	0.170004	High	0.151945	High	High	F768L	768	CD8_High_M1_High
EZ1EJYNM2P	SL423034	mut	II	0.131835	High	0.133968	High	High	R821C	821	CD8_High_M1_High
19S0JZ3JLJ	SL393339	mut	II	0.170004	High	0.151945	High	High	R1386W	1386	CD8_High_M1_High
3A94OQZPMY	SL392017	mut	II	0.142809	High	0.132239	High	High	H1627R	1627	CD8_High_M1_High
GUC3Y9K1I9	FT_SA167458	mut	II	0.158724	High	0.427259	High	High	M1706V	1706	CD8_High_M1_High
0HPR0MD9YC	FT_SA172306	mut	II	0.23091	High	0.202756	High	High	N1952fs	1952	CD8_High_M1_High
8SJ86GPKA4	SL519021	mut	II	0.0186258	Low	0.104479	High	High	P286R	286	CD8_High_M1_Low
HQO2VJX4A8	SL318916	mut	II	0.0215117	Low	0.0842242	High	High	P286R	286	CD8_High_M1_Low
PU5L5CGHBO	FT_SA164542	mut	II	0	Low	0.0686722	High	High	S297F	297	CD8_High_M1_Low
ZQOHT5NRYP	SL415750	mut	II	0.0436006	Low	0.0895723	High	High	G395W	395	CD8_High_M1_Low
PASUI2F187	SL404721	mut	II	0.0584789	Low	0.118921	High	High	E396fs	396	CD8_High_M1_Low
ZQOHT5NRYP	SL415750	mut	II	0.0436006	Low	0.0895723	High	High	M562T	562	CD8_High_M1_Low
ZQOHT5NRYP	SL415750	mut	II	0.0436006	Low	0.0895723	High	High	M676T	676	CD8_High_M1_Low
XNJNTQEK4I	FT_SA201006	mut	II	0.0352338	Low	0.100053	High	High	N751fs	751	CD8_High_M1_Low
57F69A0F1A	FT_SA161557	mut	II	0.0244524	Low	0.113228	High	High	R759C	759	CD8_High_M1_Low
FO3H6AAJX2	A37678	mut	II	0.0472361	Low	0.130618	High	High	V867I	867	CD8_High_M1_Low
PU5L5CGHBO	FT_SA164542	mut	II	0	Low	0.0686722	High	High	Y1018C	1018	CD8_High_M1_Low
FO3H6AAJX2	A37678	mut	II	0.0472361	Low	0.130618	High	High	S1040F	1040	CD8_High_M1_Low
HQO2VJX4A8	SL318916	mut	II	0.0215117	Low	0.0842242	High	High	F1366L	1366	CD8_High_M1_Low
XNJNTQEK4I	FT_SA201006	mut	II	0.0352338	Low	0.100053	High	High	P1432L	1432	CD8_High_M1_Low
FO3H6AAJX2	A37678	mut	II	0.0472361	Low	0.130618	High	High	K1540N	1540	CD8_High_M1_Low
PASUI2F187	SL404721	mut	II	0.0584789	Low	0.118921	High	High	S1650C	1650	CD8_High_M1_Low
8SJ86GPKA4	SL519021	mut	II	0.0186258	Low	0.104479	High	High	R1826W	1826	CD8_High_M1_Low
8SJ86GPKA4	SL519021	mut	II	0.0186258	Low	0.104479	High	High	R1839H	1839	CD8_High_M1_Low
HQO2VJX4A8	SL318916	mut	II	0.0215117	Low	0.0842242	High	High	P1987S	1987	CD8_High_M1_Low
V1GI0QOIXZ	FT_SA172397	mut	II	0	Low	0.0278003	Low	High	Y103H	103	CD8_Low_M1_Low
56QWFK2M4H	FT_SA167322	mut	II	0.0714234	Low	0.0627097	Low	High	D275G	275	CD8_Low_M1_Low
98FZC3P9M7	SL349750	mut	II	0.0115591	Low	0.0290905	Low	High	P286R	286	CD8_Low_M1_Low
V1GI0QOIXZ	FT_SA172397	mut	II	0	Low	0.0278003	Low	High	P286S	286	CD8_Low_M1_Low
SA494AO12M	SL393427	mut	II	0.00973023	Low	0	Low	High	D291N	291	CD8_Low_M1_Low
RRRTGSKVBK	FT_SA167393	mut	II	0.0475973	Low	0.0223752	Low	High	F366fs	366	CD8_Low_M1_Low
RRRTGSKVBK	FT_SA167393	mut	II	0.0475973	Low	0.0223752	Low	High	F366fs	366	CD8_Low_M1_Low
42WJIM3SQ6	FT_SA239651	mut	II	0.0684847	Low	0.0232811	Low	High	V411L	411	CD8_Low_M1_Low
V1GI0QOIXZ	FT_SA172397	mut	II	0	Low	0.0278003	Low	High	V411L	411	CD8_Low_M1_Low
V1GI0QOIXZ	FT_SA172397	mut	II	0	Low	0.0278003	Low	High	P441L	441	CD8_Low_M1_Low
98FZC3P9M7	SL349750	mut	II	0.0115591	Low	0.0290905	Low	High	V646A	646	CD8_Low_M1_Low
U4ATT7ITH1	FT_SA172267	mut	II	0	Low	0.0165886	Low	High	R705W	705	CD8_Low_M1_Low
V1GI0QOIXZ	FT_SA172397	mut	II	0	Low	0.0278003	Low	High	A716V	716	CD8_Low_M1_Low
56QWFK2M4H	FT_SA167322	mut	II	0.0714234	Low	0.0627097	Low	High	R759C	759	CD8_Low_M1_Low
42WJIM3SQ6	FT_SA239651	mut	II	0.0684847	Low	0.0232811	Low	High	K777N	777	CD8_Low_M1_Low
56QWFK2M4H	FT_SA167322	mut	II	0.0714234	Low	0.0627097	Low	High	A895D	895	CD8_Low_M1_Low
SA494AO12M	SL393427	mut	II	0.00973023	Low	0	Low	High	A1140T	1140	CD8_Low_M1_Low
V1GI0QOIXZ	FT_SA172397	mut	II	0	Low	0.0278003	Low	High	T1196M	1196	CD8_Low_M1_Low
42WJIM3SQ6	FT_SA239651	mut	II	0.0684847	Low	0.0232811	Low	High	R1371Q	1371	CD8_Low_M1_Low
V1GI0QOIXZ	FT_SA172397	mut	II	0	Low	0.0278003	Low	High	R1471C	1471	CD8_Low_M1_Low
V1GI0QOIXZ	FT_SA172397	mut	II	0	Low	0.0278003	Low	High	R1519C	1519	CD8_Low_M1_Low
56QWFK2M4H	FT_SA167322	mut	II	0.0714234	Low	0.0627097	Low	High	R1519C	1519	CD8_Low_M1_Low
ANJMXN3WRQ	SL333394	mut	II	0.0147912	Low	0	Low	High	Q1774H	1774	CD8_Low_M1_Low
V1GI0QOIXZ	FT_SA172397	mut	II	0	Low	0.0278003	Low	High	R1909*	1909	CD8_Low_M1_Low
56QWFK2M4H	FT_SA167322	mut	II	0.0714234	Low	0.0627097	Low	High	Q2068R	2068	CD8_Low_M1_Low
V1GI0QOIXZ	FT_SA172397	mut	II	0	Low	0.0278003	Low	High	R2165C	2165	CD8_Low_M1_Low
PBQ3YKC0ZI	SL319997	mut	II	0.00167723	Low	0.0101512	Low	High	A2192V	2192	CD8_Low_M1_Low
V1GI0QOIXZ	FT_SA172397	mut	II	0	Low	0.0278003	Low	High	A2192V	2192	CD8_Low_M1_Low
I9E29D5GWL	SL426425	mut	III	0.108706	High	0.374715	High	High	Q592R	592	CD8_High_M1_High
K6VLWM1DLF	SL413373	mut	III	0.175036	High	0.326415	High	High	R821H	821	CD8_High_M1_High
M5GSE3GBWL	SL259697	mut	III	0.116222	High	0.752698	High	High	E1240K	1240	CD8_High_M1_High
MX45VQ2B4F	SL333334	mut	III	0.110794	High	0.306184	High	High	Y1865C	1865	CD8_High_M1_High
MX45VQ2B4F	SL333334	mut	III	0.110794	High	0.306184	High	High	R2017C	2017	CD8_High_M1_High
7PDS9CFR8R	SL375832	mut	III	0.0367543	Low	0.181086	High	High	R114*	114	CD8_High_M1_Low
KXE5RL98CL	SL413489	mut	III	0.0349306	Low	0.27363	High	High	A273V	273	CD8_High_M1_Low
KHFXF4ZAOI	SL404837	mut	III	0.0370778	Low	0.180769	High	High	P286R	286	CD8_High_M1_Low
KHFXF4ZAOI	SL404837	mut	III	0.0370778	Low	0.180769	High	High	P286S	286	CD8_High_M1_Low
1P1QYPFS8M	FT_SA185642	mut	III	0.0609325	Low	0.272913	High	High	G542fs	542	CD8_High_M1_Low
KXE5RL98CL	SL413489	mut	III	0.0349306	Low	0.27363	High	High	A781S	781	CD8_High_M1_Low
W8MOR38WP3	FT_SA162451	mut	III	0.00715685	Low	0	Low	High	D162G	162	CD8_Low_M1_Low
V0ZPBMTYU2	SL248700	mut	III	0.0335103	Low	0.0551313	Low	High	R249*	249	CD8_Low_M1_Low
196UCCJOG3	FT_SA182680	mut	III	0.0189919	Low	0.0671195	Low	High	P436S	436	CD8_Low_M1_Low
96UA24XSRS	FT_SA178032	mut	III	0.00397045	Low	0.0295888	Low	High	G542fs	542	CD8_Low_M1_Low
N8F7GAI34B	SL319978	mut	III	0.0427424	Low	0.00724937	Low	High	R749W	749	CD8_Low_M1_Low
TMOO9APXC3	SL376218	mut	III	0.0305754	Low	0.0535062	Low	High	R793H	793	CD8_Low_M1_Low
K6VLWM1DLF	SL413372	mut	III	0.0113002	Low	0.0624924	Low	High	R821H	821	CD8_Low_M1_Low
4E4S5TFXVD	SL322059	mut	III	0.0716691	Low	0.0168906	Low	High	P916L	916	CD8_Low_M1_Low
N8F7GAI34B	SL319978	mut	III	0.0427424	Low	0.00724937	Low	High	T1052A	1052	CD8_Low_M1_Low
O8ZU6ZIPDG	FT_SA178432	mut	III	0.00824426	Low	0.0209625	Low	High	P1481A	1481	CD8_Low_M1_Low
UKBQU7UPQD	SL365672	mut	III	0.00390166	Low	0	Low	High	R2131C	2131	CD8_Low_M1_Low
26B27HGBZ7	SL646517	mut	III	0.00500678	Low	0.097012	Low	High	A2180V	2180	CD8_Low_M1_Low
8MOD2OTTEK	SL368522	mut	III	0.000286946	Low	0.00763233	Low	High	A2239V	2239	CD8_Low_M1_Low
08Y6FY79I3	FT_SA225515	mut	II	0.00127622	Low	0.0395943	Low	Low	H1833R	1833	CD8_Low_M1_Low
PBSARASBZM	SL388237	mut	II	0.0411285	Low	0.0197647	Low	Low	E1962G	1962	CD8_Low_M1_Low
2KEBA0DKV1	SL600492	mut	III	0.0115799	Low	0.114718	High	Low	R47L	47	CD8_High_M1_Low
98NYBZOD3I	FT_SA250694	mut	III	0	Low	0.130424	High	Low	L1848R	1848	CD8_High_M1_Low
W4NSGEDD0R	FT_SA182759	mut	III	0.00256214	Low	0.0462314	Low	Low	V2007M	2007	CD8_Low_M1_Low
4KVJQSUSLP	SL333490	mut	II	0.130628	High	0.191505	High	Medium	E591G	591	CD8_High_M1_High
42GCS1RMRS	SL379578	mut	II	0.106884	High	0.21174	High	Medium	A1061T	1061	CD8_High_M1_High
9G183S0GWN	SL530240	mut	II	0.111006	High	0.246896	High	Medium	R1870C	1870	CD8_High_M1_High
KP3ZIRC6S4	A59563	mut	II	0.0327112	Low	0.1202	High	Medium	K110T	110	CD8_High_M1_Low
G17S8NENGA	FT_SA182677	mut	II	0.0188725	Low	0.0838457	High	Medium	V544M	544	CD8_High_M1_Low
G17S8NENGA	FT_SA182677	mut	II	0.0188725	Low	0.0838457	High	Medium	R821H	821	CD8_High_M1_Low
R2HVFKZVU6	SL640397	mut	II	0	Low	0	Low	Medium	P286R	286	CD8_Low_M1_Low
J66P822VFD	SL369568	mut	II	0.00193234	Low	0.0197683	Low	Medium	D1011G	1011	CD8_Low_M1_Low
TTNDSH775H	SL392036	mut	II	0.0159032	Low	0	Low	Medium	R1508H	1508	CD8_Low_M1_Low
E2WGQP2M17	SL366482	mut	II	0	Low	0.0101814	Low	Medium	P1547Q	1547	CD8_Low_M1_Low
R2HVFKZVU6	SL640397	mut	II	0	Low	0	Low	Medium	S1906Y	1906	CD8_Low_M1_Low
FJN5BXY99D	SL376163	mut	III	0.089096	High	0.326415	High	Medium	P286R	286	CD8_High_M1_High
YV430X6C9N	SL379565	mut	III	0.0789035	High	0.271657	High	Medium	E396fs	396	CD8_High_M1_High
FJN5BXY99D	SL376163	mut	III	0.089096	High	0.326415	High	Medium	Y1046*	1046	CD8_High_M1_High
YV430X6C9N	SL379565	mut	III	0.0789035	High	0.271657	High	Medium	A1072T	1072	CD8_High_M1_High
OG9INOSJ7D	SL313722	mut	III	0.115994	High	0.335769	High	Medium	E1962G	1962	CD8_High_M1_High
YV430X6C9N	SL379565	mut	III	0.0789035	High	0.271657	High	Medium	L2182M	2182	CD8_High_M1_High
2KEBA0DKV1	SL600491	mut	III	0.0403589	Low	0.139309	High	Medium	R47L	47	CD8_High_M1_Low
4XZ0L85FJZ	SL332305	mut	III	0.0739208	Low	0.0902094	Low	Medium	V131L	131	CD8_Low_M1_Low
3L6YKHU5B4	SL258497	mut	III	0.016111	Low	0.0571638	Low	Medium	R310G	310	CD8_Low_M1_Low
4XZ0L85FJZ	SL332305	mut	III	0.0739208	Low	0.0902094	Low	Medium	V474I	474	CD8_Low_M1_Low
O7SNHZJKR6	SL429393	mut	III	0.0125588	Low	0.0729105	Low	Medium	Q670L	670	CD8_Low_M1_Low
BN467SY16M	AZSFL11386	mut	III	0	Low	0.0714236	Low	Medium	R821H	821	CD8_Low_M1_Low
1SDB9UNOLR	SL651042	mut	III	0.0164267	Low	0.0464459	Low	Medium	R1485H	1485	CD8_Low_M1_Low
T1UE47M2SV	SL606724	mut	III	0	Low	0.0358265	Low	Medium	R1556Q	1556	CD8_Low_M1_Low
GTVX92ZE90	FT_SA239655	mut	III	0.00364497	Low	0.0438259	Low	Medium	S1940C	1940	CD8_Low_M1_Low
IBD0QXRZVF	FT_SA203548	mut	III	0	Low	0.0312297	Low	Medium	G2021W	2021	CD8_Low_M1_Low
