# Supplementary material for: Integrated neoantigen and immune cell profiling of POLε-mutant colorectal tumors reveals distinct immune sub-types
Source: Research Square preprint supplement (doi:10.21203/rs.3.rs-7245242/v1), 2025-09-02
Supplement: Supplementary file 2 [file 77c7cfa2f88af9850f2e1337.xlsx]

## Sheet: Supplementary Table1
Tumor mutation burden data for the selected samples/patients with POLε status
Study ID	Patient ID	Sample ID	TumorMutationalBurden	POLε Status
gi_colorectal_cancer.s	00DC4UH8MG	00DC4UH8MG_SL430691_A65099	29.6732	Mut
gi_colorectal_cancer.s	039NL108XC	039NL108XC_SL243610_SL241694	2.85064	Mut
gi_colorectal_cancer.s	08Y6FY79I3	08Y6FY79I3_FT-SA225515R_FT-SA225515D	33.7144	Mut
gi_colorectal_cancer.s	0HPR0MD9YC	0HPR0MD9YC_FT-SA172306R_FT-SA172306D	40.7244	Mut
gi_colorectal_cancer.s	196UCCJOG3	196UCCJOG3_FT-SA182680R_FT-SA182680D	178.642	Mut
gi_colorectal_cancer.s	19S0JZ3JLJ	19S0JZ3JLJ_SL400930_SL393339	350.683	Mut
gi_colorectal_cancer.s	1P1QYPFS8M	1P1QYPFS8M_FT-SA185642R_FT-SA185642D	36.4127	Mut
gi_colorectal_cancer.s	1QGA5SOZJ3	1QGA5SOZJ3_FT-SA236136R_FT-SA236136D	192.94	Mut
gi_colorectal_cancer.s	1SDB9UNOLR	1SDB9UNOLR_SL654904_SL651042	1.39086	Mut
gi_colorectal_cancer.s	26B27HGBZ7	26B27HGBZ7_SL643558_SL646517	63.0616	Mut
gi_colorectal_cancer.s	2BYRVIHYIY	2BYRVIHYIY_SL347323	84.3675	Mut
gi_colorectal_cancer.s	2BYRVIHYIY	2BYRVIHYIY_SL350047_SL347365	49.5551	Mut
gi_colorectal_cancer.s	2KEBA0DKV1	2KEBA0DKV1_SL567653_SL600492	2.39228	Mut
gi_colorectal_cancer.s	2KEBA0DKV1	2KEBA0DKV1_SL567671_SL600491	2.69827	Mut
gi_colorectal_cancer.s	2LRFCFQ4DU	2LRFCFQ4DU_SL418860_SL415786	3.0667	Mut
gi_colorectal_cancer.s	2T8JJRA50Q	2T8JJRA50Q_SL242314_SL242869	34.6396	Mut
gi_colorectal_cancer.s	2W3PJMN48W	2W3PJMN48W_FT-SA116107R_FT-SA116107D	2.24323	Mut
gi_colorectal_cancer.s	2W3PJMN48W	2W3PJMN48W_SL344735_SL333584	1.38213	Mut
gi_colorectal_cancer.s	3A94OQZPMY	3A94OQZPMY_SL399211_SL392017	32.967	Mut
gi_colorectal_cancer.s	3L6YKHU5B4	3L6YKHU5B4_SL242437_SL258497	29.3991	Mut
gi_colorectal_cancer.s	42GCS1RMRS	42GCS1RMRS_SL378358_SL379578	25.8966	Mut
gi_colorectal_cancer.s	42WJIM3SQ6	42WJIM3SQ6_FT-SA239651R_FT-SA239651D	470.528	Mut
gi_colorectal_cancer.s	4E4S5TFXVD	4E4S5TFXVD_SL324798_SL322059	28.8232	Mut
gi_colorectal_cancer.s	4KVJQSUSLP	4KVJQSUSLP_SL343283_SL333490	31.3859	Mut
gi_colorectal_cancer.s	4XZ0L85FJZ	4XZ0L85FJZ_SL339447_SL332305	49.5839	Mut
gi_colorectal_cancer.s	53N2K2UCTN	53N2K2UCTN_SL372484_SL373095	0.46071	Mut
gi_colorectal_cancer.s	56QWFK2M4H	56QWFK2M4H_FT-SA167322R_FT-SA167322D	309.466	Mut
gi_colorectal_cancer.s	57F69A0F1A	57F69A0F1A_FT-SA161557R_FT-SA161557D	48.2628	Mut
gi_colorectal_cancer.s	6V7MH91A7N	6V7MH91A7N_SL527124_SL519025	50.2314	Mut
gi_colorectal_cancer.s	7FF1Y7GPTN	7FF1Y7GPTN_FT-SA161551R_FT-SA161551D	25.9813	Mut
gi_colorectal_cancer.s	7L4QC2HFRY	7L4QC2HFRY_SL408114_SL404738	48.8684	Mut
gi_colorectal_cancer.s	7PDS9CFR8R	7PDS9CFR8R_SL381464_SL375832	108.726	Mut
gi_colorectal_cancer.s	8M4KRPWN7U	8M4KRPWN7U_SL324750_SL322066	20.1273	Mut
gi_colorectal_cancer.s	8M7YAUHICP	8M7YAUHICP_SL341304_SL333185	38.8436	Mut
gi_colorectal_cancer.s	8MOD2OTTEK	8MOD2OTTEK_SL367631_SL368522	38.6996	Mut
gi_colorectal_cancer.s	8SJ86GPKA4	8SJ86GPKA4_SL526200_SL519021	309.708	Mut
gi_colorectal_cancer.s	8ZJAB10GTI	8ZJAB10GTI_SL558976_SL539291	2.08559	Mut
gi_colorectal_cancer.s	96UA24XSRS	96UA24XSRS_FT-SA178032R_FT-SA178032D	2.39228	Mut
gi_colorectal_cancer.s	96UA24XSRS	96UA24XSRS_FT-SA178033R_FT-SA178033D	2.44791	Mut
gi_colorectal_cancer.s	98FZC3P9M7	98FZC3P9M7_SL359798_SL349750	343.373	Mut
gi_colorectal_cancer.s	98NYBZOD3I	98NYBZOD3I_FT-SA250694R_FT-SA250694D	3.67187	Mut
gi_colorectal_cancer.s	9G183S0GWN	9G183S0GWN_SL529786_SL530240	2.81114	Mut
gi_colorectal_cancer.s	A8O7L2B33T	A8O7L2B33T_SL414324_SL413656	2.72596	Mut
gi_colorectal_cancer.s	A8O7L2B33T	A8O7L2B33T_SL414343_SL413551	3.54942	Mut
gi_colorectal_cancer.s	A8O7L2B33T	A8O7L2B33T_SL417071_SL413370	2.69756	Mut
gi_colorectal_cancer.s	ANJMXN3WRQ	ANJMXN3WRQ_SL343249_SL333394	33.603	Mut
gi_colorectal_cancer.s	AVM2LABQ04	AVM2LABQ04_SL342667_SL333361	53.0392	Mut
gi_colorectal_cancer.s	AYX6XJ2VD7	AYX6XJ2VD7_FT-SA172318R_FT-SA172318D	1.86375	Mut
gi_colorectal_cancer.s	B7K5P97LEE	B7K5P97LEE_SL324507_SL320121	2.10199	Mut
gi_colorectal_cancer.s	BN467SY16M	BN467SY16M_AZSFL11386-RNA_AZSFL11386-DNA	2.00284	Mut
gi_colorectal_cancer.s	BN467SY16M	BN467SY16M_SL643503_SL646070	2.78172	Mut
gi_colorectal_cancer.s	BQHFF2GV6H	BQHFF2GV6H_SL324453_SL319991	2.59149	Mut
gi_colorectal_cancer.s	DT1C7UJOPW	DT1C7UJOPW_SL423844_SL425947	25.6978	Mut
gi_colorectal_cancer.s	E2WGQP2M17	E2WGQP2M17_SL364170_SL366483	1.43972	Mut
gi_colorectal_cancer.s	E2WGQP2M17	E2WGQP2M17_SL364230_SL366482	3.5705	Mut
gi_colorectal_cancer.s	E2WGQP2M17	E2WGQP2M17_SL364231_SL366408	1.78525	Mut
gi_colorectal_cancer.s	EZ1EJYNM2P	EZ1EJYNM2P_SL421162_SL423034	57.7846	Mut
gi_colorectal_cancer.s	F6B8WM3ESR	F6B8WM3ESR_SL380080_SL375848	38.6177	Mut
gi_colorectal_cancer.s	F70ALSKEOI	F70ALSKEOI_AZSFH08225-RNA_AZSFH08225-DNA	5.3409	Mut
gi_colorectal_cancer.s	FJN5BXY99D	FJN5BXY99D_SL385487_SL376163	225.63	Mut
gi_colorectal_cancer.s	FO3H6AAJX2	FO3H6AAJX2_SL423282_A37678	60.9365	Mut
gi_colorectal_cancer.s	G17S8NENGA	G17S8NENGA_FT-SA182677R_FT-SA182677D	3.69969	Mut
gi_colorectal_cancer.s	GTVX92ZE90	GTVX92ZE90_FT-SA239655R_FT-SA239655D	2.30883	Mut
gi_colorectal_cancer.s	GUC3Y9K1I9	GUC3Y9K1I9_FT-SA167458R_FT-SA167458D	50.5716	Mut
gi_colorectal_cancer.s	HPXBMVKIHP	HPXBMVKIHP_SL392445_SL388441	49.2376	Mut
gi_colorectal_cancer.s	HQO2VJX4A8	HQO2VJX4A8_SL319492_SL318916	304.155	Mut
gi_colorectal_cancer.s	I9E29D5GWL	I9E29D5GWL_SL428787_SL426425	25.1583	Mut
gi_colorectal_cancer.s	IBD0QXRZVF	IBD0QXRZVF_FT-SA203548R_FT-SA203548D	4.11694	Mut
gi_colorectal_cancer.s	IBD0QXRZVF	IBD0QXRZVF_FT-SA203549R_FT-SA203549D	3.78314	Mut
gi_colorectal_cancer.s	IOQTBMMVIJ	IOQTBMMVIJ_FT-SA161540R_FT-SA161540D	9.04059	Mut
gi_colorectal_cancer.s	IOQTBMMVIJ	IOQTBMMVIJ_FT-SA161541R_FT-SA161541D	3.00426	Mut
gi_colorectal_cancer.s	J0D0HUUJQJ	J0D0HUUJQJ_SL654916_SL650998	39.0831	Mut
gi_colorectal_cancer.s	J66P822VFD	J66P822VFD_SL335012	2.27476	Mut
gi_colorectal_cancer.s	J66P822VFD	J66P822VFD_SL376918_SL369568	1.64128	Mut
gi_colorectal_cancer.s	JLRQBD7DGQ	JLRQBD7DGQ_SL376933_SL369539	58.8845	Mut
gi_colorectal_cancer.s	JZFFI4VK74	JZFFI4VK74_SL641141_SL641111	30.432	Mut
gi_colorectal_cancer.s	K6VLWM1DLF	K6VLWM1DLF_SL417073_SL413372	39.4696	Mut
gi_colorectal_cancer.s	K6VLWM1DLF	K6VLWM1DLF_SL417074_SL413373	40.8609	Mut
gi_colorectal_cancer.s	KCWXW8GW38	KCWXW8GW38_SL371115_SL369454	26.4044	Mut
gi_colorectal_cancer.s	KHFXF4ZAOI	KHFXF4ZAOI_SL408448_SL404837	316.864	Mut
gi_colorectal_cancer.s	KP3ZIRC6S4	KP3ZIRC6S4_SL430659_A59563	49.0388	Mut
gi_colorectal_cancer.s	KXE5RL98CL	KXE5RL98CL_SL412211_SL413489	57.529	Mut
gi_colorectal_cancer.s	M5GSE3GBWL	M5GSE3GBWL_SL252579_SL259697	2.01561	Mut
gi_colorectal_cancer.s	MX45VQ2B4F	MX45VQ2B4F_SL342659_SL333334	137.781	Mut
gi_colorectal_cancer.s	N8F7GAI34B	N8F7GAI34B_SL324500_SL319978	33.1423	Mut
gi_colorectal_cancer.s	NIA4QHGQHA	NIA4QHGQHA_FT-SA35743R_FT-SA35743D	2.35682	Mut
gi_colorectal_cancer.s	O7SNHZJKR6	O7SNHZJKR6_SL428929_SL429393	4.51486	Mut
gi_colorectal_cancer.s	O8ZU6ZIPDG	O8ZU6ZIPDG_FT-SA178432R_FT-SA178432D	3.22679	Mut
gi_colorectal_cancer.s	OG9INOSJ7D	OG9INOSJ7D_SL316694_SL313722	24.1873	Mut
gi_colorectal_cancer.s	OT4IDX8Y2W	OT4IDX8Y2W_SL243590_SL244077	5.67249	Mut
gi_colorectal_cancer.s	OXZUEQT4PT	OXZUEQT4PT_SL310763_SL283815	2.5627	Mut
gi_colorectal_cancer.s	PASUI2F187	PASUI2F187_SL407956_SL404721	43.1894	Mut
gi_colorectal_cancer.s	PBQ3YKC0ZI	PBQ3YKC0ZI_SL323023_SL319997	38.9876	Mut
gi_colorectal_cancer.s	PBSARASBZM	PBSARASBZM_SL392675_SL388237	43.0474	Mut
gi_colorectal_cancer.s	PH17D8N4R1	PH17D8N4R1_SL330230_SL341580	2.73547	Mut
gi_colorectal_cancer.s	PU5L5CGHBO	PU5L5CGHBO_FT-SA164542R_FT-SA164542D	167.042	Mut
gi_colorectal_cancer.s	QLEQI215B3	QLEQI215B3_SL380008_SL387952	21.2397	Mut
gi_colorectal_cancer.s	R2HVFKZVU6	R2HVFKZVU6_SL639255_SL640397	213.803	Mut
gi_colorectal_cancer.s	R2KU6C3GEL	R2KU6C3GEL_SL542812_SL536265	88.6504	Mut
gi_colorectal_cancer.s	RME8JHDY1E	RME8JHDY1E_SL392676_SL388241	20.3027	Mut
gi_colorectal_cancer.s	RRRTGSKVBK	RRRTGSKVBK_FT-SA167393R_FT-SA167393D	261.927	Mut
gi_colorectal_cancer.s	SA494AO12M	SA494AO12M_SL400999_SL393427	66.7007	Mut
gi_colorectal_cancer.s	T1UE47M2SV	T1UE47M2SV_SL612037_SL606724	2.08629	Mut
gi_colorectal_cancer.s	TMOO9APXC3	TMOO9APXC3_SL385489_SL376218	43.2462	Mut
gi_colorectal_cancer.s	TTNDSH775H	TTNDSH775H_SL399139_SL392036	11.4717	Mut
gi_colorectal_cancer.s	U4ATT7ITH1	U4ATT7ITH1_FT-SA172267R_FT-SA172267D	146.179	Mut
gi_colorectal_cancer.s	UKBQU7UPQD	UKBQU7UPQD_SL368638_SL365672	40.888	Mut
gi_colorectal_cancer.s	UTPR7XWFWH	UTPR7XWFWH_SL385413_SL388070	49.8623	Mut
gi_colorectal_cancer.s	UTPR7XWFWH	UTPR7XWFWH_SL385414_SL388071	27.3447	Mut
gi_colorectal_cancer.s	V0ZPBMTYU2	V0ZPBMTYU2_SL250134_SL248700	42.2414	Mut
gi_colorectal_cancer.s	V1GI0QOIXZ	V1GI0QOIXZ_FT-SA172397R_FT-SA172397D	341.094	Mut
gi_colorectal_cancer.s	W4NSGEDD0R	W4NSGEDD0R_FT-SA182759R_FT-SA182759D	2.30883	Mut
gi_colorectal_cancer.s	W8MOR38WP3	W8MOR38WP3_FT-SA162451R_FT-SA162451D	38.4434	Mut
gi_colorectal_cancer.s	W8MOR38WP3	W8MOR38WP3_FT-SA162452R_FT-SA162452D	31.5169	Mut
gi_colorectal_cancer.s	WIN5EGGI0G	WIN5EGGI0G_SL398578_SL391250	53.6389	Mut
gi_colorectal_cancer.s	WIX67220NA	WIX67220NA_FT-SA178422R_FT-SA178422D	52.2685	Mut
gi_colorectal_cancer.s	WWXAUFGGG0	WWXAUFGGG0_FT-SA167231R_FT-SA167231D	36.7187	Mut
gi_colorectal_cancer.s	X4DXGUQXAK	X4DXGUQXAK_SL526195_SL519013	55.6833	Mut
gi_colorectal_cancer.s	X9Q7DHLUZD	X9Q7DHLUZD_SL381471_SL375850	29.7584	Mut
gi_colorectal_cancer.s	XAJ1LWI5J1	XAJ1LWI5J1_SL429882_SL429389	33.5349	Mut
gi_colorectal_cancer.s	XNJNTQEK4I	XNJNTQEK4I_FT-SA201006R_FT-SA201006D	38.8884	Mut
gi_colorectal_cancer.s	XT83JEWKLM	XT83JEWKLM_SL407010_SL402357	3.03831	Mut
gi_colorectal_cancer.s	YJAJ7SEHCW	YJAJ7SEHCW_SL672982_SL667301	2.44791	Mut
gi_colorectal_cancer.s	YJAJ7SEHCW	YJAJ7SEHCW_SL673021_SL667303	2.11411	Mut
gi_colorectal_cancer.s	YJAJ7SEHCW	YJAJ7SEHCW_SL673054_SL667302	3.17116	Mut
gi_colorectal_cancer.s	YTTQ2YXUHB	YTTQ2YXUHB_SL397609_SL390770	63.6624	Mut
gi_colorectal_cancer.s	YV430X6C9N	YV430X6C9N_SL375732_SL379565	28.5941	Mut
gi_colorectal_cancer.s	Z9DZYYIWDY	Z9DZYYIWDY_SL330199_SL341584	37.7206	Mut
gi_colorectal_cancer.s	ZEU45JV3XF	ZEU45JV3XF_SL356020_SL350626	0.662271	Mut
gi_colorectal_cancer.s	ZMATQKJRJR	ZMATQKJRJR_FT-SA161535R_FT-SA161535D	2.00284	Mut
gi_colorectal_cancer.s	ZQOHT5NRYP	ZQOHT5NRYP_SL418661_SL415750	80.5861	Mut
gi_colorectal_cancer.s	06ND6MZ7Y7	06ND6MZ7Y7_SL355574_SL349761	2.18837	Wild
gi_colorectal_cancer.s	0V7YEOJDWT	0V7YEOJDWT_SL462166_SL435826	3.49263	Wild
gi_colorectal_cancer.s	0Y6O3QTSCF	0Y6O3QTSCF_SL417098_SL413381	18.5422	Wild
gi_colorectal_cancer.s	0YRSRLEE9X	0YRSRLEE9X_SL346424_SL333795	2.53391	Wild
gi_colorectal_cancer.s	10DTM2THWO	10DTM2THWO_SL430712_A58475	1.70372	Wild
gi_colorectal_cancer.s	12W6CHEGKA	12W6CHEGKA_SL324778_SL322043	1.61249	Wild
gi_colorectal_cancer.s	19BSTB76IP	19BSTB76IP_SL398435_SL391316	1.98768	Wild
gi_colorectal_cancer.s	1AMB5WCNG2	1AMB5WCNG2_SL408425_SL404880	1.10742	Wild
gi_colorectal_cancer.s	1KJGOJONAM	1KJGOJONAM_SL242315_SL242878	0.0575888	Wild
gi_colorectal_cancer.s	1MWN0RD0HY	1MWN0RD0HY_SL252585_SL250481	3.85845	Wild
gi_colorectal_cancer.s	1OBH27SN1S	1OBH27SN1S_SL385596_SL376203	2.07286	Wild
gi_colorectal_cancer.s	1SK6RPVMLM	1SK6RPVMLM_SL410723_SL407093	2.32842	Wild
gi_colorectal_cancer.s	1SK6RPVMLM	1SK6RPVMLM_SL410766_SL405071	1.13582	Wild
gi_colorectal_cancer.s	1UOS7F9HI0	1UOS7F9HI0_SL342730_SL333416	2.5627	Wild
gi_colorectal_cancer.s	1YPFE95EU5	1YPFE95EU5_SL371098_SL365759	1.26695	Wild
gi_colorectal_cancer.s	2745VOIQMH	2745VOIQMH_SL324780_SL322053	1.84284	Wild
gi_colorectal_cancer.s	2KSZEBPFAK	2KSZEBPFAK_SL397919_SL390826	6.1334	Wild
gi_colorectal_cancer.s	2Q0ECM82HP	2Q0ECM82HP_SL324808_SL322037	3.13859	Wild
gi_colorectal_cancer.s	2QUUAECE4T	2QUUAECE4T_SL310791_SL283813	1.58369	Wild
gi_colorectal_cancer.s	2W3PJMN48W	2W3PJMN48W_SL344735_SL333584	1.38213	Wild
gi_colorectal_cancer.s	3BKX5AAXKW	3BKX5AAXKW_FT-SA116112R_FT-SA116112D	2.86793	Wild
gi_colorectal_cancer.s	3D3FKJO2EB	3D3FKJO2EB_SL355558_SL349791	2.79305	Wild
gi_colorectal_cancer.s	3E4D5CYMZR	3E4D5CYMZR_SL324764_SL322060	1.87163	Wild
gi_colorectal_cancer.s	3F16CLHHBD	3F16CLHHBD_SL243584_SL242815	3.16738	Wild
gi_colorectal_cancer.s	3G7Q2U3PFT	3G7Q2U3PFT_SL323015_SL323530	0.604682	Wild
gi_colorectal_cancer.s	3PRZXKSTNP	3PRZXKSTNP_SL368689_SL364492	40.6865	Wild
gi_colorectal_cancer.s	3RVMHJY92R	3RVMHJY92R_SL343275_SL333534	4.00242	Wild
gi_colorectal_cancer.s	3TAT6XEUKX	3TAT6XEUKX_SL529792_SL530246	1.95928	Wild
gi_colorectal_cancer.s	4TPB7LSOQS	4TPB7LSOQS_SL365938_SL364467	49.987	Wild
gi_colorectal_cancer.s	4VPY8J5ZWY	4VPY8J5ZWY_SL373381_SL372897	1.78525	Wild
gi_colorectal_cancer.s	4VPY8J5ZWY	4VPY8J5ZWY_SL400429_SL391213	1.93089	Wild
gi_colorectal_cancer.s	4Y7O7H2CBD	4Y7O7H2CBD_SL242362_SL242873	0.547093	Wild
gi_colorectal_cancer.s	4YZW6TYRVU	4YZW6TYRVU_SL416389_SL409676	7.80873	Wild
gi_colorectal_cancer.s	4ZR4R6ZDMW	4ZR4R6ZDMW_SL398575_SL391242	2.15805	Wild
gi_colorectal_cancer.s	51E7NSM5AJ	51E7NSM5AJ_SL324748_SL322051	2.87944	Wild
gi_colorectal_cancer.s	5GGWH2J98A	5GGWH2J98A_SL382099_SL388148	1.30619	Wild
gi_colorectal_cancer.s	5RZPR513C9	5RZPR513C9_SL528214_SL526611	1.70372	Wild
gi_colorectal_cancer.s	5TBHTJDPNT	5TBHTJDPNT_SL243586_SL244065	2.93703	Wild
gi_colorectal_cancer.s	5U5L2G4RFG	5U5L2G4RFG_FT-SA196386R_FT-SA196386D	2.11411	Wild
gi_colorectal_cancer.s	5U9I3MJ0UV	5U9I3MJ0UV_SL410456_SL405077	1.76051	Wild
gi_colorectal_cancer.s	6OHMGX277Y	6OHMGX277Y_SL430542_SL429692	2.69756	Wild
gi_colorectal_cancer.s	75RAE380PF	75RAE380PF_SL392667_SL388427	3.80498	Wild
gi_colorectal_cancer.s	7IKG0T926L	7IKG0T926L_SL382103_SL388338	0.198768	Wild
gi_colorectal_cancer.s	86R8IO5X0U	86R8IO5X0U_SL423280_A38410	2.64077	Wild
gi_colorectal_cancer.s	88S7SPFFP4	88S7SPFFP4_FT-SA165261R_FT-SA165261D	2.64263	Wild
gi_colorectal_cancer.s	88Z8K182LA	88Z8K182LA_SL310762_SL285028	2.87944	Wild
gi_colorectal_cancer.s	89C11X11Q8	89C11X11Q8_FT-SA172328R_FT-SA172328D	2.25319	Wild
gi_colorectal_cancer.s	89XNZ8XVDF	89XNZ8XVDF_SL411432_SL406781	0.170372	Wild
gi_colorectal_cancer.s	8AIZHZOX3R	8AIZHZOX3R_SL533856_SL523562	4.884	Wild
gi_colorectal_cancer.s	8LHC6R99X0	8LHC6R99X0_SL324814_SL322103	2.33234	Wild
gi_colorectal_cancer.s	919KTI4NO9	919KTI4NO9_SL257914_SL261677	0.662271	Wild
gi_colorectal_cancer.s	989C7SNG5R	989C7SNG5R_SL322878_SL322110	1.64128	Wild
gi_colorectal_cancer.s	98YMNQFL36	98YMNQFL36_SL368658_SL365664	3.34015	Wild
gi_colorectal_cancer.s	9UW92WSERE	9UW92WSERE_SL392651_SL388238	1.53335	Wild
gi_colorectal_cancer.s	9V58DODOAJ	9V58DODOAJ_SL242452_SL242904	1.92922	Wild
gi_colorectal_cancer.s	9V7T05IF8N	9V7T05IF8N_SL430686_A57394	1.16421	Wild
gi_colorectal_cancer.s	9VFDTYF1NN	9VFDTYF1NN_SL422305_SL425940	1.44816	Wild
gi_colorectal_cancer.s	9VY0FL5IKE	9VY0FL5IKE_SL432565_SL431450	1.73212	Wild
gi_colorectal_cancer.s	A8QWL7QK45	A8QWL7QK45_FT-SA155708R_FT-SA155708D	1.11269	Wild
gi_colorectal_cancer.s	AB7B94HYBL	AB7B94HYBL_SL385443_SL388097	3.20868	Wild
gi_colorectal_cancer.s	ANKA3D2LH2	ANKA3D2LH2_FT-SA178421R_FT-SA178421D	0.166903	Wild
gi_colorectal_cancer.s	AOV1CEF0LZ	AOV1CEF0LZ_FT-SA35737R_FT-SA35737D	31.0361	Wild
gi_colorectal_cancer.s	AQM1WI3UZ2	AQM1WI3UZ2_SL324793_SL322039	47.7411	Wild
gi_colorectal_cancer.s	B1FKR0QHXE	B1FKR0QHXE_SL373402_SL372904	2.15958	Wild
gi_colorectal_cancer.s	B2FKGW62SE	B2FKGW62SE_SL555490_SL519008	2.4704	Wild
gi_colorectal_cancer.s	B6DX5UYBHK	B6DX5UYBHK_SL343258_SL333407	1.90043	Wild
gi_colorectal_cancer.s	BRRGWHF45Q	BRRGWHF45Q_SL420499_SL419143	2.18644	Wild
gi_colorectal_cancer.s	BZ4JVWSW3R	BZ4JVWSW3R_SL365861_SL364465	0.143972	Wild
gi_colorectal_cancer.s	CBVHQ9618Q	CBVHQ9618Q_SL368622_SL365686	3.51291	Wild
gi_colorectal_cancer.s	CDOMGQLZ4A	CDOMGQLZ4A_SL371114_SL369451	1.20936	Wild
gi_colorectal_cancer.s	DAK6JJ778A	DAK6JJ778A_FT-SA116118R_FT-SA116118D	2.86793	Wild
gi_colorectal_cancer.s	DV4OO8QAU4	DV4OO8QAU4_FT-SA116108R_FT-SA116108D	2.49879	Wild
gi_colorectal_cancer.s	MH53CIQA41	MH53CIQA41_FT-SA111222R_FT-SA111222D	0.681489	Wild
gi_colorectal_cancer.s	QO64JQJWXX	QO64JQJWXX_FT-SA116121R_FT-SA116121D	5.16796	Wild
gi_colorectal_cancer.s	VM7IDE280X	VM7IDE280X_FT-SA143631R_FT-SA143631D	1.97502	Wild
gi_colorectal_cancer.s	XESRZQZ39T	XESRZQZ39T_FT-SA153888R_FT-SA153888D	2.44791	Wild
gi_colorectal_cancer.s	Z8Y3YUTJIF	Z8Y3YUTJIF_FT-SA157285R_FT-SA157285D	1.83593	Wild
gi_colorectal_cancer.s	Z8Y3YUTJIF	Z8Y3YUTJIF_FT-SA157286R_FT-SA157286D	1.97502	Wild
gi_colorectal_cancer.s	Z8Y3YUTJIF	Z8Y3YUTJIF_FT-SA157287R_FT-SA157287D	0.0556344	Wild
