# Supplementary material for: Integrated neoantigen and immune cell profiling of POLε-mutant colorectal tumors reveals distinct immune sub-types
Source: Research Square preprint supplement (doi:10.21203/rs.3.rs-7245242/v1), 2025-09-02
Supplement: Supplementary file 3 [file c430df907fe1d7b24b20cc43.docx]

**Supplementary Figure Legends**

**Supplementary Figure 1: Survival of colorectal cancer patients sub-grouped by stage. A)** Survival of stage II colorectal cancer patients with Wildtype (WT) or POLε-mutant tumors. **B)** Survival of stage III colorectal cancer patients with Wildtype (WT) or POLε-mutant tumors.

**Supplementary Figure 2: Survival of POLε-mutant tumors sub-grouped by stage and neoantigen levels. A)** Survival of stage II and III POLε-mutant colorectal cancer patients with high neoantigen levels. **B)** Survival of stage II and III POLε-mutant colorectal cancer patients with medium neoantigen levels.

**Supplementary Figure 3: POLε-mutant tumors sub-grouped by CD8+ T cell levels do not correlate with survival. A)** Survival of stage II POLε-mutant colorectal cancer patients separated by CD8+ T cell levels. **B)** Survival of stage III POLε-mutant colorectal cancer patients separated by CD8+ T cell levels. **C)** Survival of stage II and III POLε-mutant colorectal cancer patients separated by CD8+ T cell levels.

**Supplementary Figure 4:** **POLε-mutant tumors with different immune cell infiltrations show limited transcriptional changes. A)** Heatmap of gene expression changes in POLε-mutant tumors with high CD8+ T cells and M1 macrophages, relative to POLε-mutant tumors with high CD8+ T cells and M1 low macrophages. **B)** Heatmap of gene expression changes in WT tumors, relative to POLε-mutant tumors with low CD8+ T cells and M1 macrophages. **C)** Heatmap of gene expression changes in WT tumors, relative to POLε-mutant tumors with high CD8+ T cells and M1 macrophages. **D)** Heatmap of gene expression changes in WT tumors, relative to POLε-mutant tumors with high CD8+ T cells and low M1 macrophages.

**Supplementary Figure 5: Mutations with** **POLε correlate with different neoantigens and immune cell infiltrates. A)** POLε-mutation analysis M1 macrophage high and low tumors and their correlation with CD8+ T cells and neoantigen production. **B)** POLε-mutation analysis CD8+ T cell high and low tumors and their correlation with M1 macrophages and neoantigen production. **C)** POLε-mutation analysis CD8+ T cell high and low tumors.

**Supplementary Table Legends**

**Supplementary Table 1: Tumor mutation burden data for the selected samples/patients with POLε status.**

**Supplementary Table 2: Sample/Patient data with Neoantigen expression levels and TMB values.**

**Supplementary Table 3: Samples/patients classified based on M1 Macrophages, CD8 T cells, and Neoantigen expression levels in stage II and III with the mutation information.**
