# Supplementary material for: Integrated neoantigen and immune cell profiling of POLε-mutant colorectal tumors reveals distinct immune sub-types
Source: Research Square preprint supplement (doi:10.21203/rs.3.rs-7245242/v1), 2025-09-02
Supplement: Supplementary file 4 [file eb472129048a06bc11359f38.xlsx]

## Sheet: Supplementary Table2
Sample/Patient data with Neoantigen expression levels and TMB values
Sample ID	Patient ID	POLε Status	Stage	NeoExpressionLevel	TMB
0Y6O3QTSCF_SL417098_SL413381	0Y6O3QTSCF	wild	I	High	18.5422
1YPFE95EU5_SL371098_SL365759	1YPFE95EU5	wild	I	High	1.26695
3PRZXKSTNP_SL368689_SL364492	3PRZXKSTNP	wild	I	High	40.6865
7L4QC2HFRY_SL408114_SL404738	7L4QC2HFRY	mut	I	High	48.8684
KCWXW8GW38_SL371115_SL369454	KCWXW8GW38	mut	I	High	26.4044
QLEQI215B3_SL380008_SL387952	QLEQI215B3	mut	I	High	21.2397
R2KU6C3GEL_SL542812_SL536265	R2KU6C3GEL	mut	I	High	88.6504
WIN5EGGI0G_SL398578_SL391250	WIN5EGGI0G	mut	I	High	53.6389
7FF1Y7GPTN_FT-SA161551R_FT-SA161551D	7FF1Y7GPTN	mut	I	High	25.9813
F70ALSKEOI_AZSFH08225-RNA_AZSFH08225-DNA	F70ALSKEOI	mut	I	High	5.3409
JZFFI4VK74_SL641141_SL641111	JZFFI4VK74	mut	I	Low	30.432
J0D0HUUJQJ_SL654916_SL650998	J0D0HUUJQJ	mut	I	Low	39.0831
2Q0ECM82HP_SL324808_SL322037	2Q0ECM82HP	wild	I	Medium	3.13859
86R8IO5X0U_SL423280_A38410	86R8IO5X0U	wild	I	Medium	2.64077
XESRZQZ39T_FT-SA153888R_FT-SA153888D	XESRZQZ39T	wild	I	Medium	2.44791
4TPB7LSOQS_SL365938_SL364467	4TPB7LSOQS	wild	II	High	49.987
AQM1WI3UZ2_SL324793_SL322039	AQM1WI3UZ2	wild	II	High	47.7411
0HPR0MD9YC_FT-SA172306R_FT-SA172306D	0HPR0MD9YC	mut	II	High	40.7244
19S0JZ3JLJ_SL400930_SL393339	19S0JZ3JLJ	mut	II	High	350.683
3A94OQZPMY_SL399211_SL392017	3A94OQZPMY	mut	II	High	32.967
57F69A0F1A_FT-SA161557R_FT-SA161557D	57F69A0F1A	mut	II	High	48.2628
8M7YAUHICP_SL341304_SL333185	8M7YAUHICP	mut	II	High	38.8436
8SJ86GPKA4_SL526200_SL519021	8SJ86GPKA4	mut	II	High	309.708
98FZC3P9M7_SL359798_SL349750	98FZC3P9M7	mut	II	High	343.373
ANJMXN3WRQ_SL343249_SL333394	ANJMXN3WRQ	mut	II	High	33.603
EZ1EJYNM2P_SL421162_SL423034	EZ1EJYNM2P	mut	II	High	57.7846
FO3H6AAJX2_SL423282_A37678	FO3H6AAJX2	mut	II	High	60.9365
GUC3Y9K1I9_FT-SA167458R_FT-SA167458D	GUC3Y9K1I9	mut	II	High	50.5716
HQO2VJX4A8_SL319492_SL318916	HQO2VJX4A8	mut	II	High	304.155
JLRQBD7DGQ_SL376933_SL369539	JLRQBD7DGQ	mut	II	High	58.8845
PASUI2F187_SL407956_SL404721	PASUI2F187	mut	II	High	43.1894
PBQ3YKC0ZI_SL323023_SL319997	PBQ3YKC0ZI	mut	II	High	38.9876
SA494AO12M_SL400999_SL393427	SA494AO12M	mut	II	High	66.7007
XNJNTQEK4I_FT-SA201006R_FT-SA201006D	XNJNTQEK4I	mut	II	High	38.8884
ZQOHT5NRYP_SL418661_SL415750	ZQOHT5NRYP	mut	II	High	80.5861
RRRTGSKVBK_FT-SA167393R_FT-SA167393D	RRRTGSKVBK	mut	II	High	261.927
42WJIM3SQ6_FT-SA239651R_FT-SA239651D	42WJIM3SQ6	mut	II	High	470.528
PU5L5CGHBO_FT-SA164542R_FT-SA164542D	PU5L5CGHBO	mut	II	High	167.042
V1GI0QOIXZ_FT-SA172397R_FT-SA172397D	V1GI0QOIXZ	mut	II	High	341.094
56QWFK2M4H_FT-SA167322R_FT-SA167322D	56QWFK2M4H	mut	II	High	309.466
U4ATT7ITH1_FT-SA172267R_FT-SA172267D	U4ATT7ITH1	mut	II	High	146.179
8LHC6R99X0_SL324814_SL322103	8LHC6R99X0	wild	II	Low	2.33234
PBSARASBZM_SL392675_SL388237	PBSARASBZM	mut	II	Low	43.0474
08Y6FY79I3_FT-SA225515R_FT-SA225515D	08Y6FY79I3	mut	II	Low	33.7144
2745VOIQMH_SL324780_SL322053	2745VOIQMH	wild	II	Medium	1.84284
98YMNQFL36_SL368658_SL365664	98YMNQFL36	wild	II	Medium	3.34015
9V58DODOAJ_SL242452_SL242904	9V58DODOAJ	wild	II	Medium	1.92922
AOV1CEF0LZ_FT-SA35737R_FT-SA35737D	AOV1CEF0LZ	wild	II	Medium	31.0361
42GCS1RMRS_SL378358_SL379578	42GCS1RMRS	mut	II	Medium	25.8966
4KVJQSUSLP_SL343283_SL333490	4KVJQSUSLP	mut	II	Medium	31.3859
9G183S0GWN_SL529786_SL530240	9G183S0GWN	mut	II	Medium	2.81114
E2WGQP2M17_SL364230_SL366482	E2WGQP2M17	mut	II	Medium	3.5705
G17S8NENGA_FT-SA182677R_FT-SA182677D	G17S8NENGA	mut	II	Medium	3.69969
KP3ZIRC6S4_SL430659_A59563	KP3ZIRC6S4	mut	II	Medium	49.0388
RME8JHDY1E_SL392676_SL388241	RME8JHDY1E	mut	II	Medium	20.3027
TTNDSH775H_SL399139_SL392036	TTNDSH775H	mut	II	Medium	11.4717
J66P822VFD_SL376918_SL369568	J66P822VFD	mut	II	Medium	1.64128
R2HVFKZVU6_SL639255_SL640397	R2HVFKZVU6	mut	II	Medium	213.803
1P1QYPFS8M_FT-SA185642R_FT-SA185642D	1P1QYPFS8M	mut	III	High	36.4127
4E4S5TFXVD_SL324798_SL322059	4E4S5TFXVD	mut	III	High	28.8232
7PDS9CFR8R_SL381464_SL375832	7PDS9CFR8R	mut	III	High	108.726
8MOD2OTTEK_SL367631_SL368522	8MOD2OTTEK	mut	III	High	38.6996
I9E29D5GWL_SL428787_SL426425	I9E29D5GWL	mut	III	High	25.1583
K6VLWM1DLF_SL417073_SL413372	K6VLWM1DLF	mut	III	High	39.4696
K6VLWM1DLF_SL417074_SL413373	K6VLWM1DLF	mut	III	High	40.8609
KHFXF4ZAOI_SL408448_SL404837	KHFXF4ZAOI	mut	III	High	316.864
KXE5RL98CL_SL412211_SL413489	KXE5RL98CL	mut	III	High	57.529
M5GSE3GBWL_SL252579_SL259697	M5GSE3GBWL	mut	III	High	2.01561
MX45VQ2B4F_SL342659_SL333334	MX45VQ2B4F	mut	III	High	137.781
N8F7GAI34B_SL324500_SL319978	N8F7GAI34B	mut	III	High	33.1423
O8ZU6ZIPDG_FT-SA178432R_FT-SA178432D	O8ZU6ZIPDG	mut	III	High	3.22679
TMOO9APXC3_SL385489_SL376218	TMOO9APXC3	mut	III	High	43.2462
UKBQU7UPQD_SL368638_SL365672	UKBQU7UPQD	mut	III	High	40.888
V0ZPBMTYU2_SL250134_SL248700	V0ZPBMTYU2	mut	III	High	42.2414
W8MOR38WP3_FT-SA162451R_FT-SA162451D	W8MOR38WP3	mut	III	High	38.4434
26B27HGBZ7_SL643558_SL646517	26B27HGBZ7	mut	III	High	63.0616
196UCCJOG3_FT-SA182680R_FT-SA182680D	196UCCJOG3	mut	III	High	178.642
W4NSGEDD0R_FT-SA182759R_FT-SA182759D	W4NSGEDD0R	mut	III	Low	2.30883
96UA24XSRS_FT-SA178032R_FT-SA178032D	96UA24XSRS	mut	III	High	2.39228
CBVHQ9618Q_SL368622_SL365686	CBVHQ9618Q	wild	III	Low	3.51291
2KEBA0DKV1_SL567653_SL600492	2KEBA0DKV1	mut	III	Low	2.39228
98NYBZOD3I_FT-SA250694R_FT-SA250694D	98NYBZOD3I	mut	III	Low	3.67187
4VPY8J5ZWY_SL373381_SL372897	4VPY8J5ZWY	wild	III	Medium	1.78525
51E7NSM5AJ_SL324748_SL322051	51E7NSM5AJ	wild	III	Medium	2.87944
5U5L2G4RFG_FT-SA196386R_FT-SA196386D	5U5L2G4RFG	wild	III	Medium	2.11411
88Z8K182LA_SL310762_SL285028	88Z8K182LA	wild	III	Medium	2.87944
B1FKR0QHXE_SL373402_SL372904	B1FKR0QHXE	wild	III	Medium	2.15958
B2FKGW62SE_SL555490_SL519008	B2FKGW62SE	wild	III	Medium	2.4704
QO64JQJWXX_FT-SA116121R_FT-SA116121D	QO64JQJWXX	wild	III	Medium	5.16796
2BYRVIHYIY_SL350047_SL347365	2BYRVIHYIY	mut	III	Medium	49.5551
3L6YKHU5B4_SL242437_SL258497	3L6YKHU5B4	mut	III	Medium	29.3991
4XZ0L85FJZ_SL339447_SL332305	4XZ0L85FJZ	mut	III	Medium	49.5839
FJN5BXY99D_SL385487_SL376163	FJN5BXY99D	mut	III	Medium	225.63
O7SNHZJKR6_SL428929_SL429393	O7SNHZJKR6	mut	III	Medium	4.51486
OG9INOSJ7D_SL316694_SL313722	OG9INOSJ7D	mut	III	Medium	24.1873
YV430X6C9N_SL375732_SL379565	YV430X6C9N	mut	III	Medium	28.5941
2KEBA0DKV1_SL567671_SL600491	2KEBA0DKV1	mut	III	Medium	2.69827
GTVX92ZE90_FT-SA239655R_FT-SA239655D	GTVX92ZE90	mut	III	Medium	2.30883
IBD0QXRZVF_FT-SA203548R_FT-SA203548D	IBD0QXRZVF	mut	III	Medium	4.11694
T1UE47M2SV_SL612037_SL606724	T1UE47M2SV	mut	III	Medium	2.08629
1SDB9UNOLR_SL654904_SL651042	1SDB9UNOLR	mut	III	Medium	1.39086
BN467SY16M_AZSFL11386-RNA_AZSFL11386-DNA	BN467SY16M	mut	III	Medium	2.00284
2T8JJRA50Q_SL242314_SL242869	2T8JJRA50Q	mut	IV	High	34.6396
6V7MH91A7N_SL527124_SL519025	6V7MH91A7N	mut	IV	High	50.2314
AVM2LABQ04_SL342667_SL333361	AVM2LABQ04	mut	IV	High	53.0392
HPXBMVKIHP_SL392445_SL388441	HPXBMVKIHP	mut	IV	High	49.2376
XAJ1LWI5J1_SL429882_SL429389	XAJ1LWI5J1	mut	IV	High	33.5349
1QGA5SOZJ3_FT-SA236136R_FT-SA236136D	1QGA5SOZJ3	mut	IV	High	192.94
IOQTBMMVIJ_FT-SA161540R_FT-SA161540D	IOQTBMMVIJ	mut	IV	High	9.04059
0V7YEOJDWT_SL462166_SL435826	0V7YEOJDWT	wild	IV	Low	3.49263
0YRSRLEE9X_SL346424_SL333795	0YRSRLEE9X	wild	IV	Medium	2.53391
12W6CHEGKA_SL324778_SL322043	12W6CHEGKA	wild	IV	Medium	1.61249
3BKX5AAXKW_FT-SA116112R_FT-SA116112D	3BKX5AAXKW	wild	IV	Medium	2.86793
3E4D5CYMZR_SL324764_SL322060	3E4D5CYMZR	wild	IV	Medium	1.87163
3TAT6XEUKX_SL529792_SL530246	3TAT6XEUKX	wild	IV	Medium	1.95928
6OHMGX277Y_SL430542_SL429692	6OHMGX277Y	wild	IV	Medium	2.69756
8ZJAB10GTI_SL558976_SL539291	8ZJAB10GTI	mut	IV	Medium	2.08559
OT4IDX8Y2W_SL243590_SL244077	OT4IDX8Y2W	mut	IV	Medium	5.67249
PH17D8N4R1_SL330230_SL341580	PH17D8N4R1	mut	IV	Medium	2.73547
X9Q7DHLUZD_SL381471_SL375850	X9Q7DHLUZD	mut	IV	Medium	29.7584
ZEU45JV3XF_SL356020_SL350626	ZEU45JV3XF	mut	IV	Medium	0.662271
YJAJ7SEHCW_SL673054_SL667302	YJAJ7SEHCW	mut	IV	Medium	3.17116
